# Supplementary material for: Characterization of DNA methylation clock algorithms applied to diverse tissue types
Source: publisher site journal article supplement (doi:10.18632/aging.206182), 2025-01-03
Supplement: Supplementary file [file aging-v16-206182-supplementary-material-SD1.pdf]

## SUPPLEMENTARY FIGURES

### A (not age-adjusted)

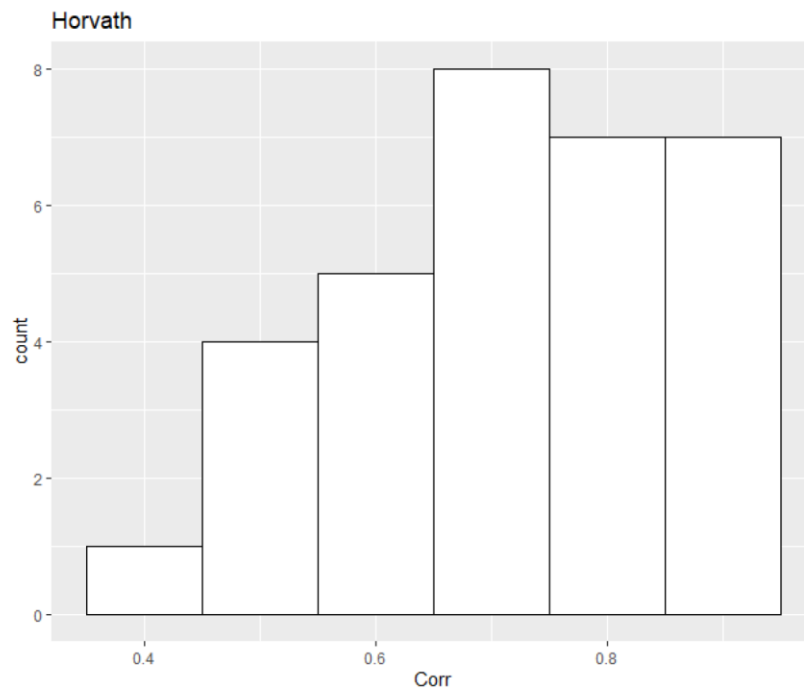

### B (age-adjusted)

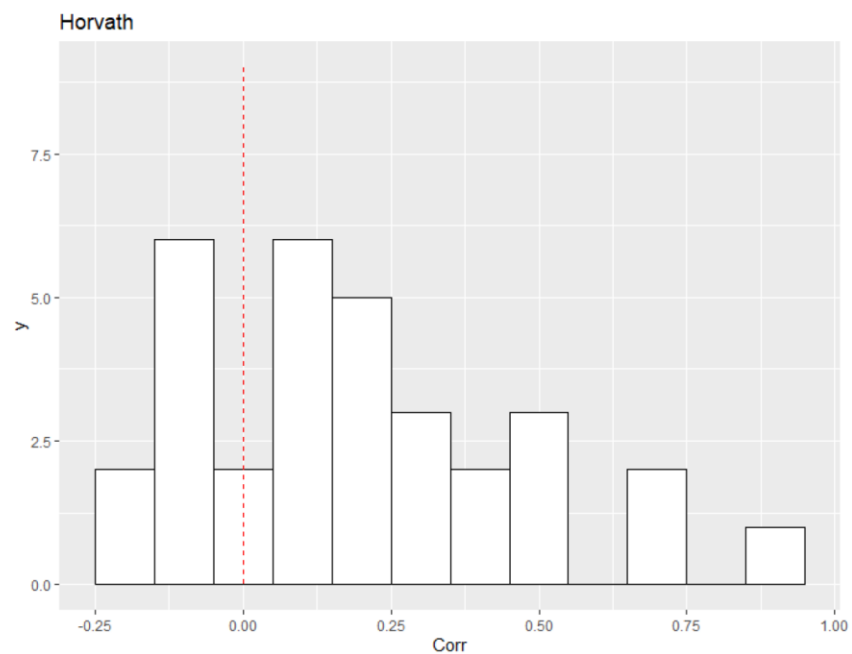

**Supplementary Figure 1.** Distribution of Correlation Estimates (from Supplementary Table 3) for all Tissue pairs for the Horvath Clock (A), not age-adjusted; (B) age-adjusted.

### A(not age adjusted)

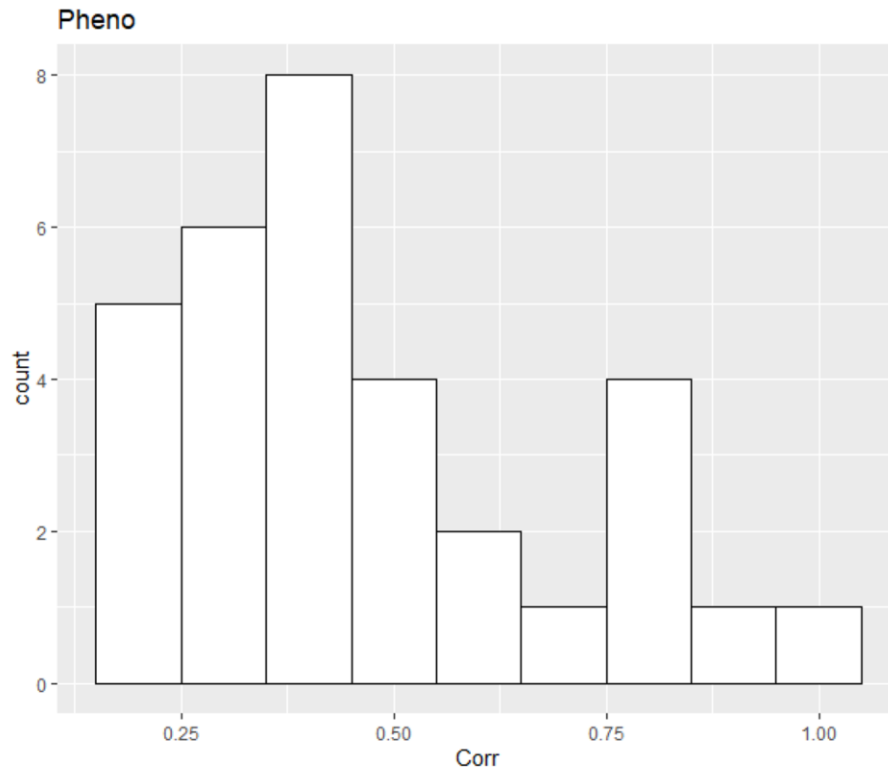

### B(age-adjusted)

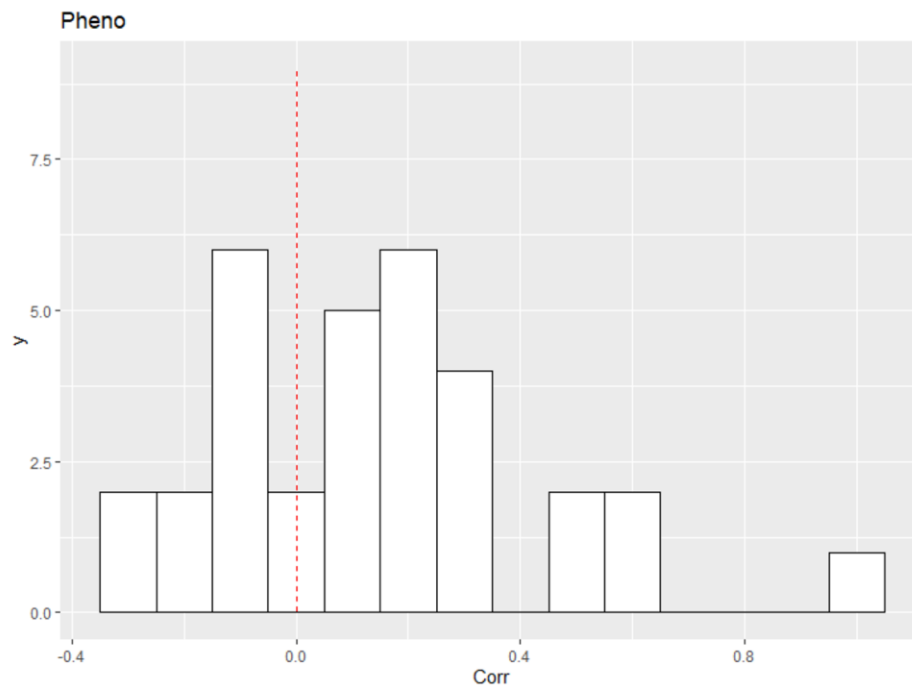

**Supplementary Figure 2.** Distribution of Correlation Estimates (from Supplementary Table 4) for all Tissue pairs for the PhenoAge Clock (A), not age-adjusted; (B) age-adjusted.

**A** (not age-adjusted)

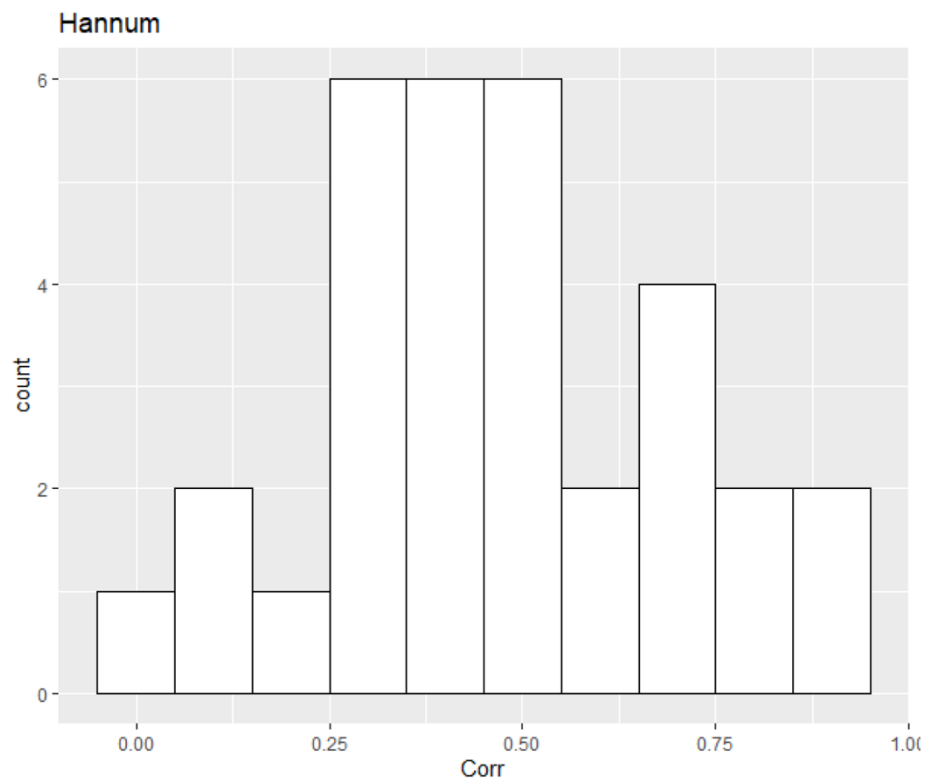

**B** (age adjusted)

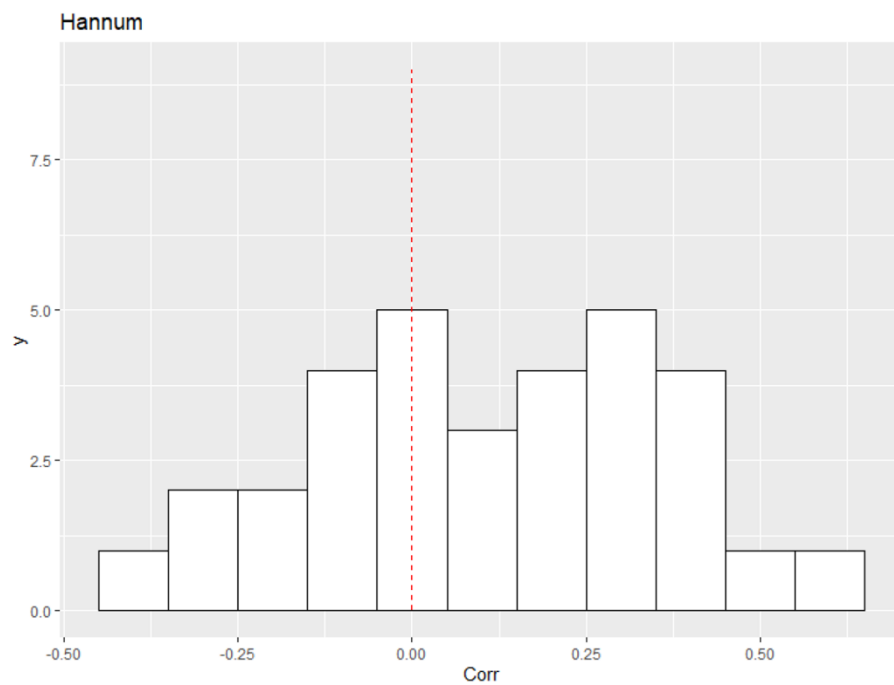

**Supplementary Figure 3.** Distribution of Correlation Estimates (from Supplementary Table 5) for all Tissue pairs for the Hannum Clock (**A**), not age-adjusted; (**B**) age-adjusted.

### A (not age-adjusted)

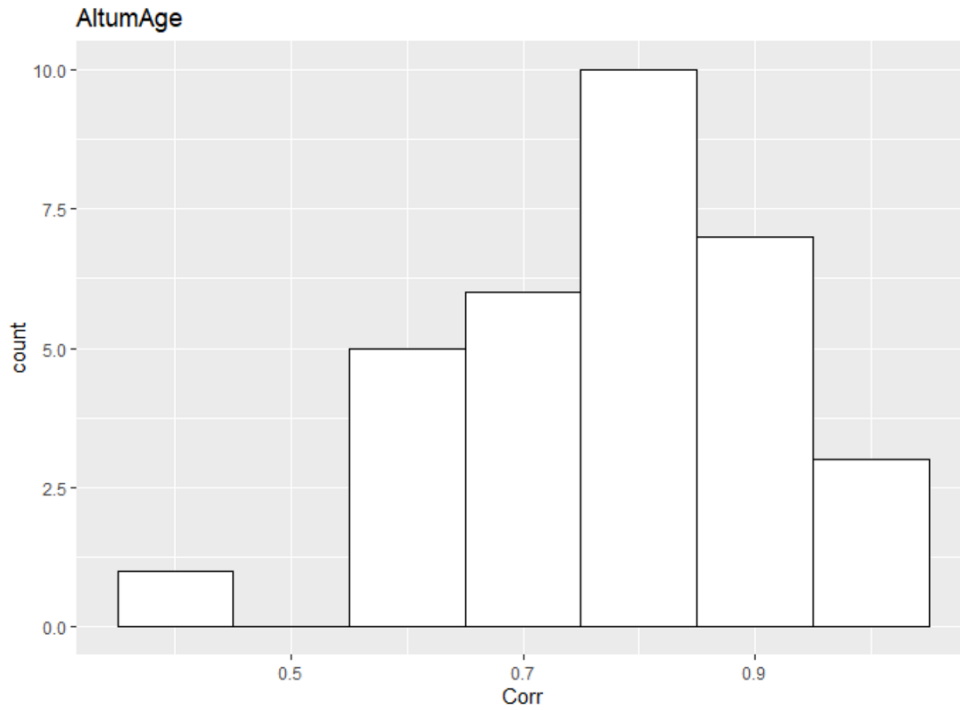

### B (age-adjusted)

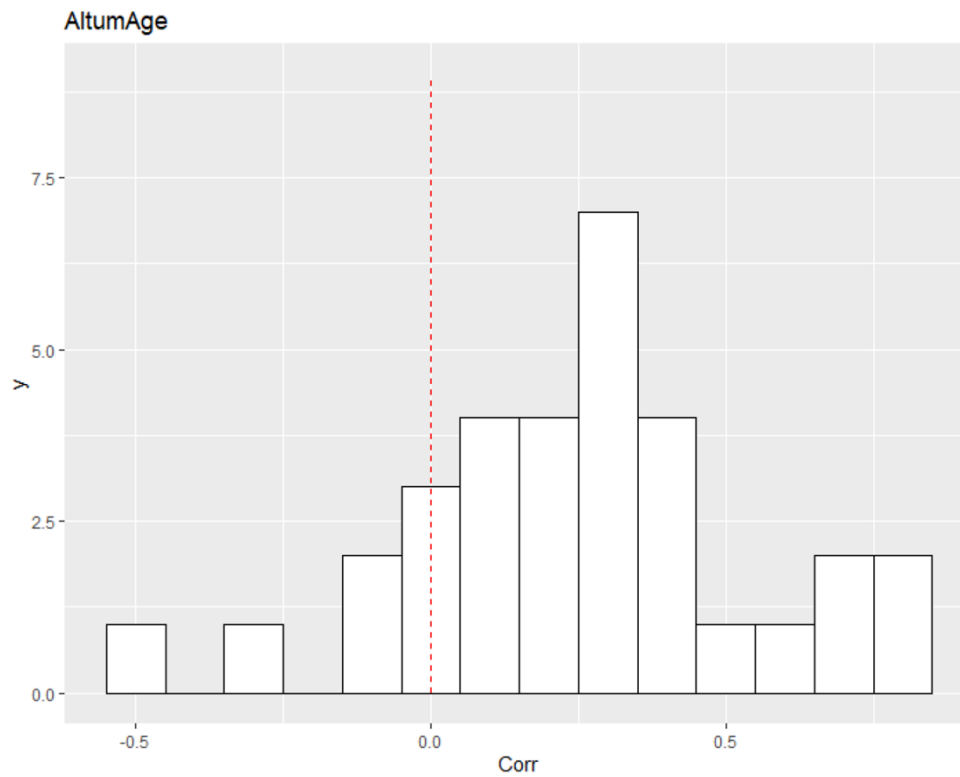

**Supplementary Figure 4.** Distribution of Correlation Estimates (from Supplementary Table 6) for all Tissue pairs for the AltumAge Clock (A), not age-adjusted; (B) age-adjusted.

### A (not age-adjusted)

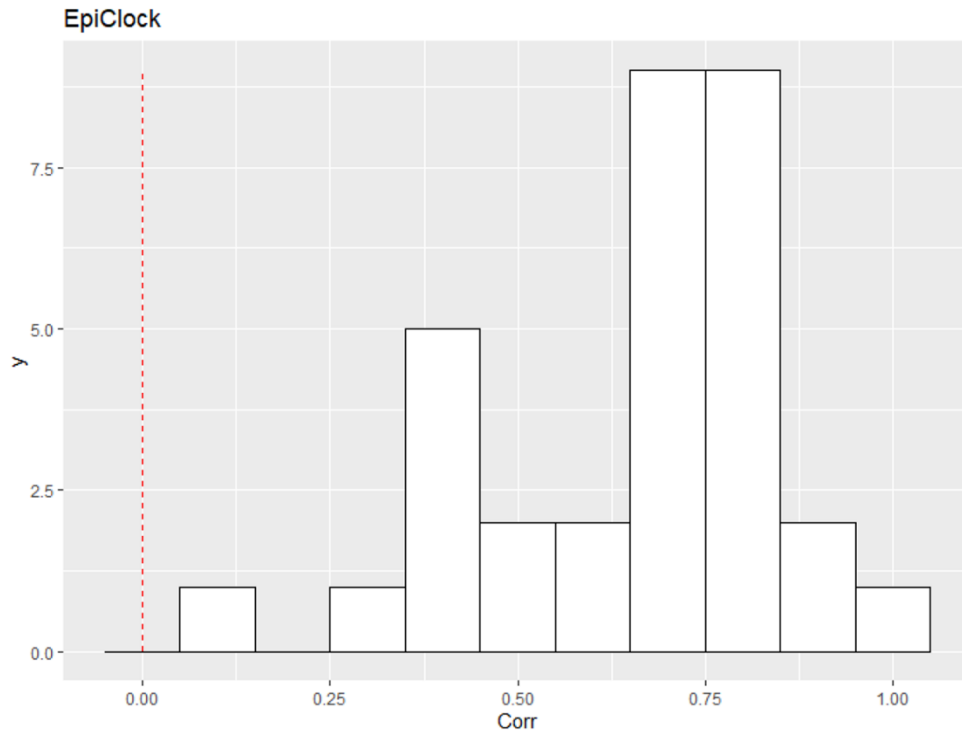

### B (age-adjusted)

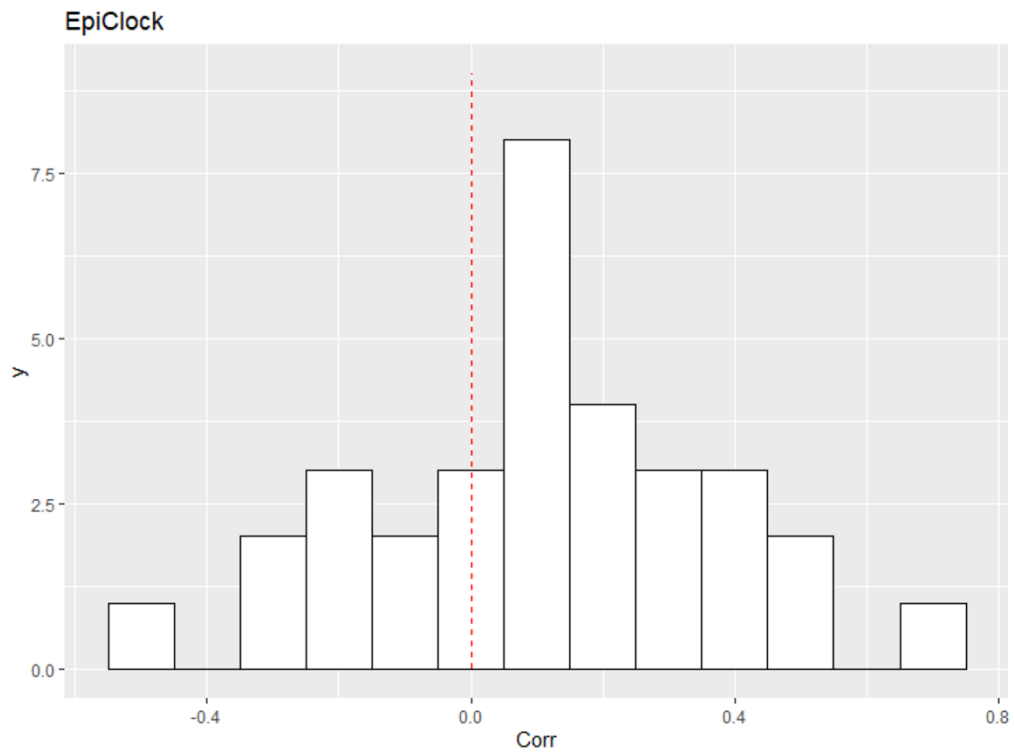

**Supplementary Figure 5.** Distribution of Correlation Estimates (from Supplementary Table 7) for all Tissue pairs for EpiClock (A), not age-adjusted; (B) age-adjusted.

### A (not age-adjusted)

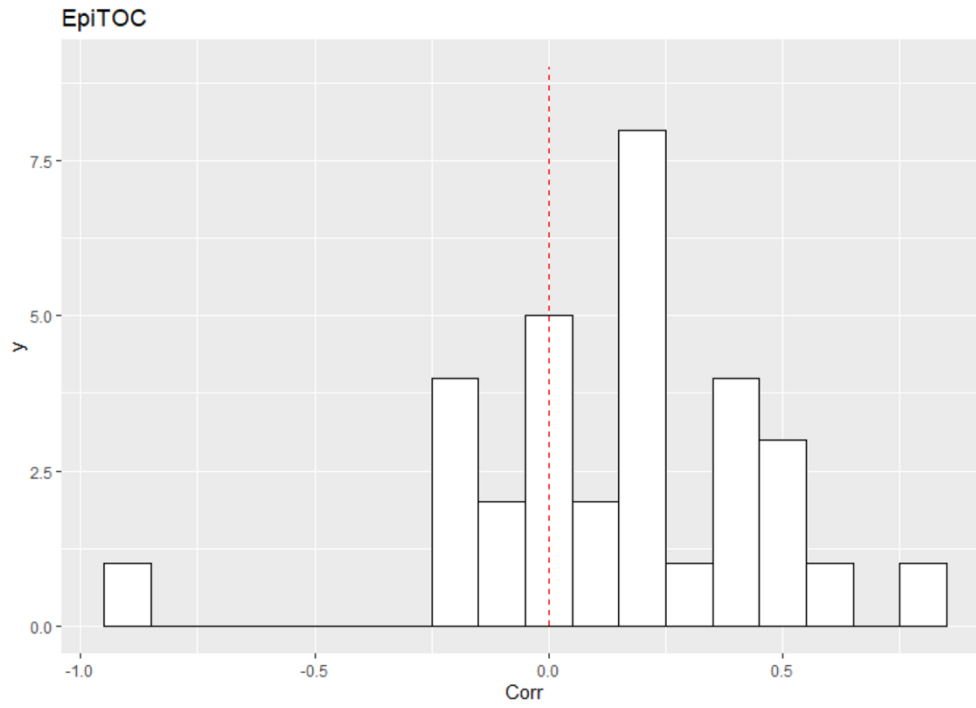

### B (age-adjusted)

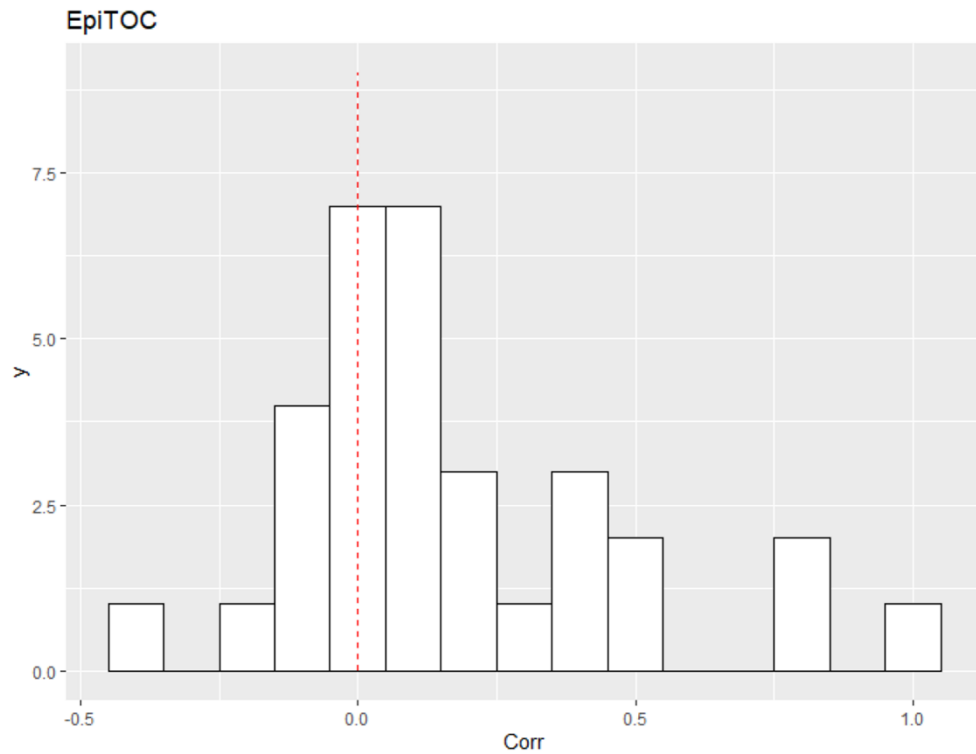

**Supplementary Figure 6.** Distribution of Correlation Estimates (from Supplementary Table 8) for all Tissue pairs for EpiTOC (A), not age-adjusted; (B) age-adjusted.

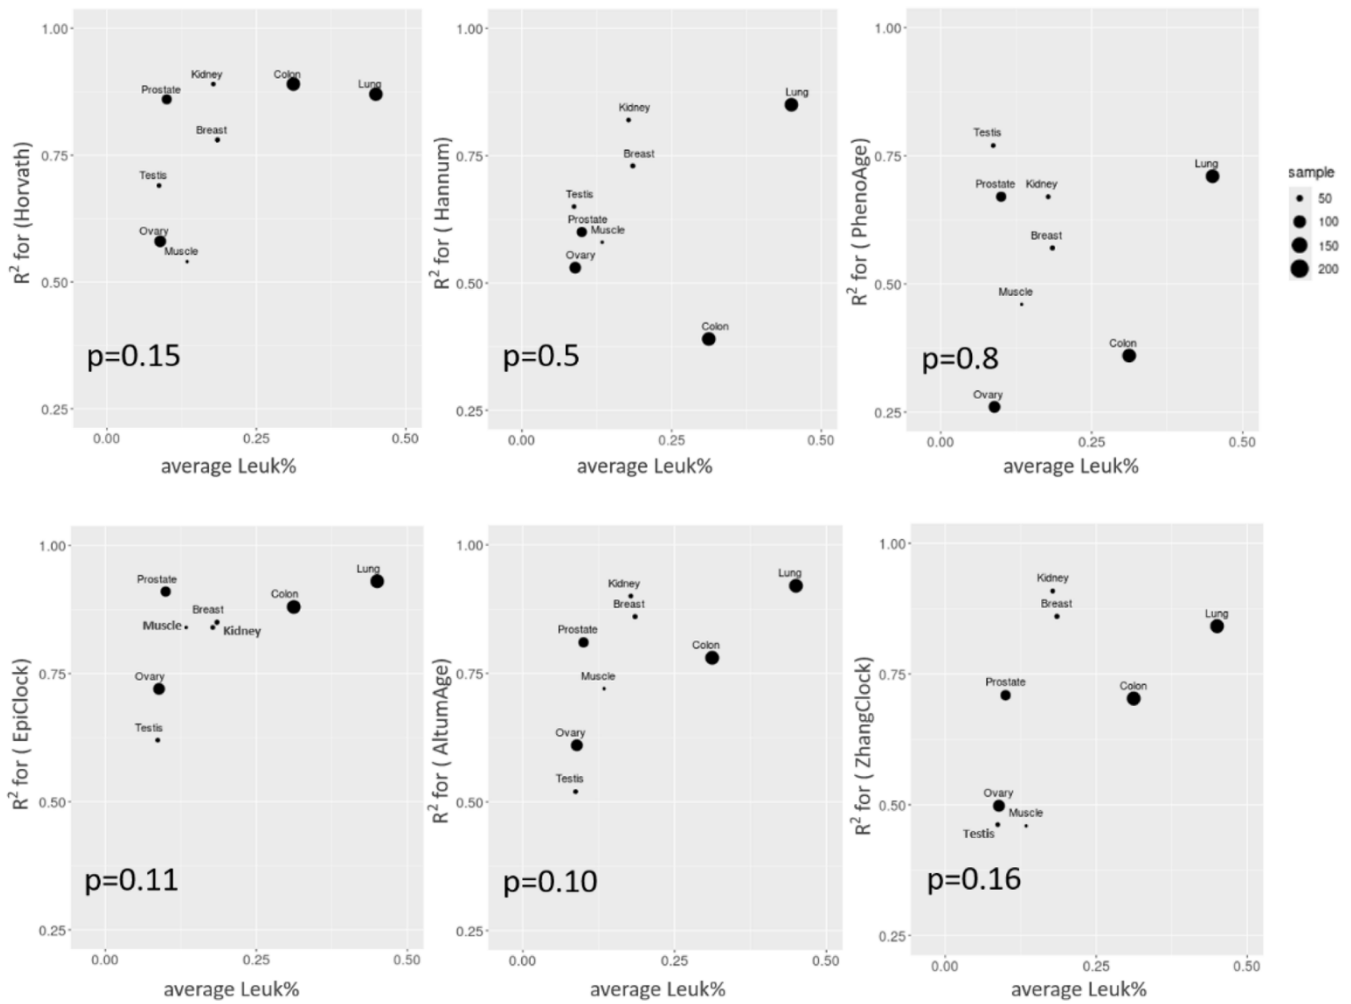

**Supplementary Figure 7. Scatter plot of average leukocyte percentage (from LUMP) vs. the R<sup>2</sup> for each clock's association with chronological age.** P-values correspond to the association between leukocyte percentage and the R<sup>2</sup> value (n=8).
