# Supplementary material for: Characterization of DNA methylation clock algorithms applied to diverse tissue types
Source: publisher site journal article supplement (doi:10.18632/aging.206182), 2025-01-03
Supplement: Supplementary file [file aging-v17i1-206182-supplementary-material-SD2.pdf]

## SUPPLEMENTARY TABLES

**Supplementary Table 1. Median absolute error/difference for each clock, by tissue type.**

| <b>Clock</b> | <b>Breast</b> | <b>Colon</b> | <b>Kidney</b> | <b>Lung</b> | <b>Muscle</b> | <b>Ovary</b> | <b>Prostate</b> | <b>Testis</b> | <b>Blood</b> |
|--------------|---------------|--------------|---------------|-------------|---------------|--------------|-----------------|---------------|--------------|
| AltumAge     | 16.17         | 17.72        | 22.49         | 10.51       | 14.17         | 6.333        | 12.65           | 14.26         | 13.51        |
| Horvath      | 3.524         | 4.974        | 3.375         | 3.991       | 14.72         | 25.56        | 4.732           | 20.38         | 2.976        |
| PhenoAge     | 23.63         | 21.26        | 38.27         | 29.98       | 55.50         | 60.87        | 30.40           | 43.86         | 4.807        |
| EpiClock     | 8.644         | 4.564        | 9.766         | 5.655       | 15.93         | 23.07        | 10.89           | 29.12         | 2.607        |
| Hannum       | 22.07         | 13.66        | 18.44         | 7.733       | 41.20         | 39.54        | 20.44           | 43.08         | 5.198        |
| Zhang        | 4.534         | 7.177        | 2.781         | 7.814       | 18.43         | 14.57        | 7.647           | 29.36         | 2.016        |

**Supplementary Table 2. Average age acceleration (mean deviation) for each clock, by tissue type.**

| <b>Clock</b> | <b>Blood</b> | <b>Breast</b> | <b>Colon</b> | <b>Kidney</b> | <b>Lung</b> | <b>Muscle</b> | <b>Ovary</b> | <b>Prostate</b> | <b>Testes</b> |
|--------------|--------------|---------------|--------------|---------------|-------------|---------------|--------------|-----------------|---------------|
| Horvath      | -1.56        | 0.85          | -4.75        | -2.63         | -0.20       | -13.45        | -23.74       | 0.05            | -18.58        |
| Altum        | 9.12         | 14.89         | 15.94        | 23.11         | 4.73        | 13.16         | -0.36        | 12.09           | -10.82        |
| EpiClock     | 2.01         | -8.65         | -1.07        | -9.74         | -5.57       | -14.01        | -21.44       | -10.23          | -28.06        |
| Hannum       | -4.38        | -21.29        | -11.90       | -18.33        | -7.63       | -40.77        | -37.34       | -18.17          | -41.21        |
| PhenoAge     | -0.17        | -23.80        | -21.32       | -38.07        | -29.67      | -54.79        | -59.12       | -30.42          | -44.06        |
| Zhang        | 0.22         | -2.96         | 7.24         | -2.10         | 7.70        | -18.17        | -12.79       | -6.26           | -29.20        |

**Supplementary Table 3. Correlation between tissue types for the Horvath clock.**

| <b>Non-adjusted correlation</b> | <b>Age-adjusted correlation</b> | <b>Tissue type pair</b> | <b>Sample size</b> | <b>Chronological age range</b> |
|---------------------------------|---------------------------------|-------------------------|--------------------|--------------------------------|
| 0.769                           | 0.249                           | Breast Colon            | 15                 | 21-70                          |
| 0.927                           | -0.115                          | Breast Kidney           | 5                  | 42-66                          |
| 0.656                           | 0.231                           | Breast Lung             | 16                 | 37-70                          |
| 0.938                           | 0.894                           | Breast Muscle           | 4                  | 40-66                          |
| 0.809                           | 0.248                           | Breast Ovary            | 28                 | 21-69                          |
| 0.871                           | -0.065                          | Breast Blood            | 5                  | 42-66                          |
| 0.731                           | 0.211                           | Colon Kidney            | 38                 | 36-70                          |
| 0.819                           | 0.254                           | Colon Lung              | 153                | 22-70                          |
| 0.573                           | -0.051                          | Colon Muscle            | 28                 | 31-70                          |
| 0.457                           | -0.065                          | Colon Ovary             | 53                 | 21-70                          |
| 0.842                           | 0.223                           | Colon Prostate          | 85                 | 22-70                          |
| 0.682                           | 0.111                           | Colon Testis            | 38                 | 22-70                          |
| 0.924                           | 0.532                           | Colon Blood             | 45                 | 22-70                          |
| 0.724                           | 0.438                           | Kidney Lung             | 26                 | 39-68                          |
| 0.893                           | 0.684                           | Kidney Muscle           | 12                 | 42-70                          |
| 0.738                           | 0.656                           | Kidney Ovary            | 11                 | 42-68                          |
| 0.771                           | 0.303                           | Kidney Prostate         | 30                 | 36-70                          |
| 0.384                           | -0.234                          | Kidney Testis           | 27                 | 36-70                          |
| 0.721                           | 0.101                           | Kidney Blood            | 24                 | 36-70                          |
| 0.557                           | 0.111                           | Lung Muscle             | 25                 | 31-67                          |
| 0.469                           | -0.125                          | Lung Ovary              | 51                 | 22-70                          |
| 0.789                           | 0.132                           | Lung Prostate           | 73                 | 22-70                          |
| 0.476                           | 0.058                           | Lung Testis             | 33                 | 25-68                          |
| 0.897                           | 0.546                           | Lung Blood              | 37                 | 22-68                          |
| 0.635                           | 0.377                           | Muscle Ovary            | 12                 | 34-70                          |
| 0.761                           | 0.461                           | Muscle Prostate         | 16                 | 31-70                          |
| 0.475                           | 0.028                           | Muscle Testis           | 11                 | 31-70                          |
| 0.742                           | -0.004                          | Muscle Blood            | 11                 | 31-70                          |
| 0.581                           | -0.148                          | Ovary Blood             | 9                  | 42-66                          |
| 0.576                           | -0.201                          | Prostate Testis         | 39                 | 22-70                          |
| 0.893                           | 0.317                           | Prostate Blood          | 33                 | 22-70                          |
| 0.671                           | 0.145                           | Testis Blood            | 27                 | 22-70                          |

**Supplementary Table 4. Correlation between tissue types for the PhenoAge clock.**

| <b>Non-adjusted correlation</b> | <b>Age-adjusted correlation</b> | <b>Tissue type pair</b> | <b>Sample size</b> | <b>Chronological age range</b> |
|---------------------------------|---------------------------------|-------------------------|--------------------|--------------------------------|
| 0.483                           | 0.338                           | Breast Colon            | 15                 | 21-70                          |
| 0.852                           | 0.556                           | Breast Kidney           | 5                  | 42-66                          |
| 0.179                           | -0.341                          | Breast Lung             | 16                 | 37-70                          |
| 0.971                           | 0.971                           | Breast Muscle           | 4                  | 40-66                          |
| 0.305                           | 0.144                           | Breast Ovary            | 28                 | 21-69                          |
| 0.435                           | -0.206                          | Breast Blood            | 5                  | 42-66                          |
| 0.411                           | 0.072                           | Colon Kidney            | 38                 | 36-70                          |
| 0.259                           | 0.035                           | Colon Lung              | 153                | 22-70                          |
| 0.299                           | 0.241                           | Colon Muscle            | 28                 | 31-70                          |
| 0.221                           | 0.185                           | Colon Ovary             | 53                 | 21-70                          |
| 0.266                           | -0.046                          | Colon Prostate          | 85                 | 22-70                          |
| 0.328                           | -0.149                          | Colon Testis            | 38                 | 22-70                          |
| 0.479                           | 0.189                           | Colon Blood             | 45                 | 22-70                          |
| 0.185                           | -0.197                          | Kidney Lung             | 26                 | 39-68                          |
| 0.424                           | -0.126                          | Kidney Muscle           | 12                 | 42-70                          |
| 0.231                           | -0.281                          | Kidney Ovary            | 11                 | 42-68                          |
| 0.448                           | 0.142                           | Kidney Prostate         | 30                 | 36-70                          |
| 0.423                           | -0.099                          | Kidney Testis           | 27                 | 36-70                          |
| 0.522                           | -0.056                          | Kidney Blood            | 24                 | 36-70                          |
| 0.426                           | 0.151                           | Lung Muscle             | 25                 | 31-67                          |
| 0.218                           | 0.056                           | Lung Ovary              | 51                 | 22-70                          |
| 0.415                           | -0.085                          | Lung Prostate           | 73                 | 22-70                          |
| 0.563                           | 0.219                           | Lung Testis             | 33                 | 25-68                          |
| 0.777                           | 0.476                           | Lung Blood              | 37                 | 22-68                          |
| 0.271                           | 0.261                           | Muscle Ovary            | 12                 | 34-70                          |
| 0.449                           | 0.243                           | Muscle Prostate         | 16                 | 31-70                          |
| 0.791                           | 0.341                           | Muscle Testis           | 11                 | 31-70                          |
| 0.801                           | 0.474                           | Muscle Blood            | 11                 | 31-70                          |
| 0.615                           | 0.601                           | Ovary Blood             | 9                  | 42-66                          |
| 0.533                           | -0.058                          | Prostate Testis         | 39                 | 22-70                          |
| 0.724                           | 0.069                           | Prostate Blood          | 33                 | 22-70                          |
| 0.801                           | 0.251                           | Testis Blood            | 27                 | 22-70                          |

**Supplementary Table 5. Correlation between tissue types for the Hannum clock.**

| <b>Non-adjusted correlation</b> | <b>Age-adjusted correlation</b> | <b>Tissue type pair</b> | <b>Sample size</b> | <b>Chronological age range</b> |
|---------------------------------|---------------------------------|-------------------------|--------------------|--------------------------------|
| 0.417                           | 0.152                           | Breast Colon            | 15                 | 21-70                          |
| 0.881                           | 0.606                           | Breast Kidney           | 5                  | 42-66                          |
| 0.489                           | -0.084                          | Breast Lung             | 16                 | 37-70                          |
| 0.066                           | 0.338                           | Breast Muscle           | 4                  | 40-66                          |
| 0.479                           | 0.271                           | Breast Ovary            | 28                 | 21-69                          |
| 0.654                           | 0.183                           | Breast Blood            | 5                  | 42-66                          |
| 0.729                           | 0.439                           | Colon Kidney            | 38                 | 36-70                          |
| 0.318                           | 0.034                           | Colon Lung              | 153                | 22-70                          |
| 0.433                           | 0.391                           | Colon Muscle            | 28                 | 31-70                          |
| 0.109                           | -0.014                          | Colon Ovary             | 53                 | 21-70                          |
| 0.381                           | 0.095                           | Colon Prostate          | 85                 | 22-70                          |
| 0.266                           | -0.181                          | Colon Testis            | 38                 | 22-70                          |
| 0.532                           | 0.274                           | Colon Blood             | 45                 | 22-70                          |
| 0.493                           | 0.017                           | Kidney Lung             | 26                 | 39-68                          |
| 0.541                           | -0.071                          | Kidney Muscle           | 12                 | 42-70                          |
| 0.337                           | -0.159                          | Kidney Ovary            | 11                 | 42-68                          |
| 0.414                           | -0.041                          | Kidney Prostate         | 30                 | 36-70                          |
| 0.422                           | -0.042                          | Kidney Testis           | 27                 | 36-70                          |
| 0.743                           | 0.108                           | Kidney Blood            | 24                 | 36-70                          |
| 0.606                           | 0.327                           | Lung Muscle             | 25                 | 31-67                          |
| 0.336                           | -0.251                          | Lung Ovary              | 51                 | 22-70                          |
| 0.579                           | 0.0899                          | Lung Prostate           | 73                 | 22-70                          |
| 0.391                           | -0.129                          | Lung Testis             | 33                 | 25-68                          |
| 0.905                           | 0.462                           | Lung Blood              | 37                 | 22-68                          |
| 0.191                           | 0.178                           | Muscle Ovary            | 12                 | 34-70                          |
| 0.512                           | 0.391                           | Muscle Prostate         | 16                 | 31-70                          |
| 0.337                           | -0.109                          | Muscle Testis           | 11                 | 31-70                          |
| 0.695                           | 0.153                           | Muscle Blood            | 11                 | 31-70                          |
| -0.018                          | -0.412                          | Ovary Blood             | 9                  | 42-66                          |
| 0.314                           | -0.268                          | Prostate Testis         | 39                 | 22-70                          |
| 0.766                           | 0.261                           | Prostate Blood          | 33                 | 22-70                          |
| 0.767                           | 0.396                           | Testis Blood            | 27                 | 22-70                          |

**Supplementary Table 6. Correlation between tissue types for the AltumAge clock.**

| <b>Non-adjusted correlation</b> | <b>Age-adjusted correlation</b> | <b>Tissue type pair</b> | <b>Sample size</b> | <b>Chronological age range</b> |
|---------------------------------|---------------------------------|-------------------------|--------------------|--------------------------------|
| 0.774                           | 0.252                           | Breast Colon            | 15                 | 21-70                          |
| 0.991                           | 0.711                           | Breast Kidney           | 5                  | 42-66                          |
| 0.711                           | 0.074                           | Breast Lung             | 16                 | 37-70                          |
| 0.957                           | 0.844                           | Breast Muscle           | 4                  | 40-66                          |
| 0.724                           | 0.222                           | Breast Ovary            | 28                 | 21-69                          |
| 0.868                           | -0.493                          | Breast Blood            | 5                  | 42-66                          |
| 0.861                           | 0.518                           | Colon Kidney            | 38                 | 36-70                          |
| 0.792                           | 0.059                           | Colon Lung              | 153                | 22-70                          |
| 0.811                           | 0.347                           | Colon Muscle            | 28                 | 31-70                          |
| 0.591                           | 0.064                           | Colon Ovary             | 53                 | 21-70                          |
| 0.896                           | 0.343                           | Colon Prostate          | 85                 | 22-70                          |
| 0.608                           | 0.035                           | Colon Testis            | 38                 | 22-70                          |
| 0.963                           | 0.395                           | Colon Blood             | 45                 | 22-70                          |
| 0.752                           | 0.383                           | Kidney Lung             | 26                 | 39-68                          |
| 0.935                           | 0.841                           | Kidney Muscle           | 12                 | 42-70                          |
| 0.728                           | 0.393                           | Kidney Ovary            | 11                 | 42-68                          |
| 0.811                           | 0.266                           | Kidney Prostate         | 30                 | 36-70                          |
| 0.382                           | -0.111                          | Kidney Testis           | 27                 | 36-70                          |
| 0.837                           | 0.201                           | Kidney Blood            | 24                 | 36-70                          |
| 0.804                           | 0.167                           | Lung Muscle             | 25                 | 31-67                          |
| 0.676                           | -0.141                          | Lung Ovary              | 51                 | 22-70                          |
| 0.831                           | -0.009                          | Lung Prostate           | 73                 | 22-70                          |
| 0.647                           | 0.324                           | Lung Testis             | 33                 | 25-68                          |
| 0.949                           | 0.639                           | Lung Blood              | 37                 | 22-68                          |
| 0.929                           | 0.703                           | Muscle Ovary            | 12                 | 34-70                          |
| 0.848                           | 0.181                           | Muscle Prostate         | 16                 | 31-70                          |
| 0.648                           | 0.251                           | Muscle Testis           | 11                 | 31-70                          |
| 0.806                           | 0.397                           | Muscle Blood            | 11                 | 31-70                          |
| 0.743                           | -0.344                          | Ovary Blood             | 9                  | 42-66                          |
| 0.632                           | -0.042                          | Prostate Testis         | 39                 | 22-70                          |
| 0.908                           | 0.062                           | Prostate Blood          | 33                 | 22-70                          |
| 0.749                           | 0.319                           | Testis Blood            | 27                 | 22-70                          |

**Supplementary Table 7. Correlation between tissue types for Epiclock.**

| <b>Non-adjusted correlation</b> | <b>Age-adjusted correlation</b> | <b>Tissue type pair</b> | <b>Sample size</b> | <b>Chronological age range</b> |
|---------------------------------|---------------------------------|-------------------------|--------------------|--------------------------------|
| 0.834                           | 0.414                           | Breast Colon            | 15                 | 21-70                          |
| 0.836                           | -0.221                          | Breast Kidney           | 5                  | 42-66                          |
| 0.758                           | -0.084                          | Breast Lung             | 16                 | 37-70                          |
| 0.786                           | 0.423                           | Breast Muscle           | 4                  | 40-66                          |
| 0.725                           | 0.308                           | Breast Ovary            | 28                 | 21-69                          |
| 0.772                           | -0.485                          | Breast Blood            | 5                  | 42-66                          |
| 0.751                           | 0.141                           | Colon Kidney            | 38                 | 36-70                          |
| 0.717                           | 0.131                           | Colon Lung              | 153                | 22-70                          |
| 0.555                           | 0.235                           | Colon Muscle            | 28                 | 31-70                          |
| 0.329                           | -0.152                          | Colon Ovary             | 53                 | 21-70                          |
| 0.713                           | 0.122                           | Colon Prostate          | 85                 | 22-70                          |
| 0.507                           | 0.069                           | Colon Testis            | 38                 | 22-70                          |
| 0.857                           | 0.093                           | Colon Blood             | 45                 | 22-70                          |
| 0.799                           | 0.467                           | Kidney Lung             | 26                 | 39-68                          |
| 0.681                           | 0.315                           | Kidney Muscle           | 12                 | 42-70                          |
| 0.378                           | -0.286                          | Kidney Ovary            | 11                 | 42-68                          |
| 0.659                           | 0.211                           | Kidney Prostate         | 30                 | 36-70                          |
| 0.392                           | 0.064                           | Kidney Testis           | 27                 | 36-70                          |
| 0.891                           | 0.457                           | Kidney Blood            | 24                 | 36-70                          |
| 0.746                           | 0.213                           | Lung Muscle             | 25                 | 31-67                          |
| 0.449                           | -0.301                          | Lung Ovary              | 51                 | 22-70                          |
| 0.732                           | 0.044                           | Lung Prostate           | 73                 | 22-70                          |
| 0.367                           | -0.129                          | Lung Testis             | 33                 | 25-68                          |
| 0.964                           | 0.731                           | Lung Blood              | 37                 | 22-68                          |
| 0.667                           | 0.001                           | Muscle Ovary            | 12                 | 34-70                          |
| 0.611                           | 0.291                           | Muscle Prostate         | 16                 | 31-70                          |
| 0.444                           | 0.033                           | Muscle Testis           | 11                 | 31-70                          |
| 0.828                           | 0.394                           | Muscle Blood            | 11                 | 31-70                          |
| 0.116                           | -0.239                          | Ovary Blood             | 9                  | 42-66                          |
| 0.476                           | 0.083                           | Prostate Testis         | 39                 | 22-70                          |
| 0.844                           | 0.121                           | Prostate Blood          | 33                 | 22-70                          |
| 0.681                           | 0.244                           | Testis Blood            | 27                 | 22-70                          |

**Supplementary Table 8. Correlation between tissue types for the EpiTOC clock.**

| <b>Non-adjusted correlation</b> | <b>Age-adjusted correlation</b> | <b>Tissue type pair</b> | <b>Sample size</b> | <b>Chronological age range</b> |
|---------------------------------|---------------------------------|-------------------------|--------------------|--------------------------------|
| 0.072                           | -0.034                          | Breast Colon            | 15                 | 21-70                          |
| 0.191                           | 0.046                           | Breast Kidney           | 5                  | 42-66                          |
| -0.074                          | 0.073                           | Breast Lung             | 16                 | 37-70                          |
| -0.867                          | 0.463                           | Breast Muscle           | 4                  | 40-66                          |
| -0.086                          | 0.318                           | Breast Ovary            | 28                 | 21-69                          |
| 0.844                           | 0.833                           | Breast Blood            | 5                  | 42-66                          |
| 0.245                           | -0.035                          | Colon Kidney            | 38                 | 36-70                          |
| 0.161                           | 0.031                           | Colon Lung              | 153                | 22-70                          |
| 0.034                           | 0.057                           | Colon Muscle            | 28                 | 31-70                          |
| -0.162                          | -0.167                          | Colon Ovary             | 53                 | 21-70                          |
| 0.169                           | -0.039                          | Colon Prostate          | 85                 | 22-70                          |
| 0.287                           | -0.356                          | Colon Testis            | 38                 | 22-70                          |
| 0.413                           | 0.191                           | Colon Blood             | 45                 | 22-70                          |
| 0.379                           | 0.368                           | Kidney Lung             | 26                 | 39-68                          |
| -0.008                          | -0.057                          | Kidney Muscle           | 12                 | 42-70                          |
| 0.471                           | -0.069                          | Kidney Ovary            | 11                 | 42-68                          |
| 0.178                           | 0.109                           | Kidney Prostate         | 30                 | 36-70                          |
| 0.437                           | 0.237                           | Kidney Testis           | 27                 | 36-70                          |
| 0.461                           | 0.421                           | Kidney Blood            | 24                 | 36-70                          |
| -0.009                          | 0.044                           | Lung Muscle             | 25                 | 31-67                          |
| 0.176                           | 0.401                           | Lung Ovary              | 51                 | 22-70                          |
| 0.134                           | 0.101                           | Lung Prostate           | 73                 | 22-70                          |
| -0.155                          | 0.155                           | Lung Testis             | 33                 | 25-68                          |
| 0.541                           | 0.531                           | Lung Blood              | 37                 | 22-68                          |
| -0.168                          | 0.953                           | Muscle Ovary            | 12                 | 34-70                          |
| -0.249                          | 0.071                           | Muscle Prostate         | 16                 | 31-70                          |
| 0.571                           | 0.775                           | Muscle Testis           | 11                 | 31-70                          |
| 0.395                           | -0.087                          | Muscle Blood            | 11                 | 31-70                          |
| 0.245                           | 0.073                           | Ovary Blood             | 9                  | 42-66                          |
| -0.021                          | -0.082                          | Prostate Testis         | 39                 | 22-70                          |
| 0.218                           | 0.092                           | Prostate Blood          | 33                 | 22-70                          |
| -0.044                          | -0.038                          | Testis Blood            | 27                 | 22-70                          |

**Supplementary Table 9. Correlation between tissue types for the Zhang clock.**

| <b>Non-adjusted correlation</b> | <b>Age-adjusted correlation</b> | <b>Tissue type pair</b> | <b>Sample size</b> | <b>Chronological age range</b> |
|---------------------------------|---------------------------------|-------------------------|--------------------|--------------------------------|
| 0.662                           | 0.043                           | Breast Colon            | 15                 | 21-70                          |
| 0.851                           | 0.260                           | Breast Kidney           | 5                  | 42-66                          |
| 0.830                           | 0.048                           | Breast Lung             | 16                 | 37-70                          |
| 0.988                           | 0.882                           | Breast Muscle           | 4                  | 40-66                          |
| 0.777                           | 0.447                           | Breast Ovary            | 28                 | 21-69                          |
| 0.723                           | -0.416                          | Breast Blood            | 5                  | 42-66                          |
| 0.785                           | 0.246                           | Colon Kidney            | 38                 | 36-70                          |
| 0.713                           | 0.185                           | Colon Lung              | 152                | 22-70                          |
| 0.640                           | 0.399                           | Colon Muscle            | 28                 | 31-70                          |
| 0.375                           | 0.045                           | Colon Ovary             | 50                 | 21-70                          |
| 0.565                           | 0.041                           | Colon Prostate          | 85                 | 22-70                          |
| 0.552                           | 0.046                           | Colon Testis            | 38                 | 22-70                          |
| 0.855                           | 0.097                           | Colon Blood             | 45                 | 22-70                          |
| 0.810                           | 0.362                           | Kidney Lung             | 26                 | 39-68                          |
| 0.738                           | 0.188                           | Kidney Muscle           | 12                 | 42-70                          |
| 0.451                           | -0.179                          | Kidney Ovary            | 11                 | 42-68                          |
| 0.590                           | 0.172                           | Kidney Prostate         | 30                 | 36-70                          |
| 0.462                           | 0.079                           | Kidney Testis           | 27                 | 36-70                          |
| 0.879                           | 0.244                           | Kidney Blood            | 24                 | 36-70                          |
| 0.654                           | 0.010                           | Lung Muscle             | 25                 | 31-67                          |
| 0.643                           | -0.268                          | Lung Ovary              | 48                 | 22-70                          |
| 0.491                           | -0.400                          | Lung Prostate           | 73                 | 22-70                          |
| 0.446                           | -0.066                          | Lung Testis             | 33                 | 25-68                          |
| 0.929                           | 0.518                           | Lung Blood              | 37                 | 22-68                          |
| 0.550                           | 0.753                           | Muscle Ovary            | 12                 | 34-70                          |
| 0.660                           | 0.234                           | Muscle Prostate         | 16                 | 31-70                          |
| 0.467                           | 0.110                           | Muscle Testis           | 11                 | 31-70                          |
| 0.830                           | -0.531                          | Muscle Blood            | 11                 | 31-70                          |
| 0.192                           | -0.790                          | Ovary Blood             | 9                  | 42-66                          |
| 0.523                           | 0.167                           | Prostate Testis         | 38                 | 22-70                          |
| 0.556                           | -0.340                          | Prostate Blood          | 33                 | 22-70                          |
| 0.684                           | -0.253                          | Testis Blood            | 27                 | 22-70                          |



**Supplementary Table 10. Correlation between tissue types for DunedinPACE clock estimates.**

| <b>Non-adjusted correlation</b> | <b>Pair</b>     | <b>Sample size</b> | <b>Chronological age range</b> |
|---------------------------------|-----------------|--------------------|--------------------------------|
| 0.011                           | Breast Colon    | 15                 | 21-70                          |
| 0.509                           | Breast Kidney   | 5                  | 42-66                          |
| 0.424                           | Breast Lung     | 16                 | 37-70                          |
| 0.526                           | Breast Muscle   | 4                  | 40-66                          |
| 0.298                           | Breast Ovary    | 28                 | 21-69                          |
| 0.336                           | Breast Blood    | 5                  | 42-66                          |
| 0.358                           | Colon Kidney    | 38                 | 36-70                          |
| 0.138                           | Colon Lung      | 153                | 22-70                          |
| 0.332                           | Colon Muscle    | 28                 | 31-70                          |
| -0.160                          | Colon Ovary     | 53                 | 21-70                          |
| 0.166                           | Colon Prostate  | 85                 | 22-70                          |
| -0.174                          | Colon Testis    | 38                 | 22-70                          |
| 0.060                           | Colon Blood     | 45                 | 22-70                          |
| 0.433                           | Kidney Lung     | 26                 | 39-68                          |
| 0.181                           | Kidney Muscle   | 12                 | 42-70                          |
| 0.524                           | Kidney Ovary    | 11                 | 42-68                          |
| 0.351                           | Kidney Prostate | 30                 | 36-70                          |
| -0.471                          | Kidney Testis   | 27                 | 36-70                          |
| 0.448                           | Kidney Blood    | 24                 | 36-70                          |
| 0.026                           | Lung Muscle     | 25                 | 31-67                          |
| -0.111                          | Lung Ovary      | 51                 | 22-70                          |
| 0.167                           | Lung Prostate   | 73                 | 22-70                          |
| -0.300                          | Lung Testis     | 33                 | 25-68                          |
| 0.378                           | Lung Blood      | 37                 | 22-68                          |
| 0.540                           | Muscle Ovary    | 12                 | 34-70                          |
| 0.340                           | Muscle Prostate | 16                 | 31-70                          |
| -0.398                          | Muscle Testis   | 11                 | 31-70                          |
| 0.487                           | Muscle Blood    | 11                 | 31-70                          |
| 0.368                           | Ovary Blood     | 9                  | 42-66                          |
| -0.234                          | Prostate Testis | 39                 | 22-70                          |
| 0.308                           | Prostate Blood  | 33                 | 22-70                          |
| -0.301                          | Testis Blood    | 27                 | 22-70                          |
