# Supplementary material for: Characterization of DNA methylation clock algorithms applied to diverse tissue types
Source: publisher site journal article supplement (doi:10.18632/aging.206182), 2025-01-03
Supplement: Supplementary file [file aging-v17i1-206182-supplementary-material-SD4.pdf]

Supplementary Table 12. Linear regression of age acceleration on smoking, sex, BMI, and telomere length (non-sex specific tissues only).

| Observations    | <i>Blood</i> |                  | <i>Colon</i> |              | <i>Kidney</i> |              | <i>Lung</i> |                  | <i>Muscle</i> |              |
|-----------------|--------------|------------------|--------------|--------------|---------------|--------------|-------------|------------------|---------------|--------------|
|                 | <i>51</i>    |                  | <i>205</i>   |              | <i>47</i>     |              | <i>194</i>  |                  | <i>43</i>     |              |
|                 | <i>Beta</i>  | <i>p</i>         | <i>Beta</i>  | <i>p</i>     | <i>Beta</i>   | <i>p</i>     | <i>Beta</i> | <i>p</i>         | <i>Beta</i>   | <i>p</i>     |
| <b>Horvath</b>  |              |                  |              |              |               |              |             |                  |               |              |
| Smoking         | 3.76         | 0.055            | 0.63         | 0.328        | -4.13         | <b>0.003</b> | -0.39       | 0.593            | -3.34         | <b>0.039</b> |
| Sex             | 2.43         | 0.250            | 0.14         | 0.820        | -1.14         | 0.368        | -0.13       | 0.857            | -1.84         | 0.219        |
| BMI             | 0.53         | <b>0.009</b>     | 0.13         | 0.085        | -0.32         | 0.034        | 0.17        | <b>0.050</b>     | 0.09          | 0.581        |
| TQI             | 1.26         | 0.738            | -0.59        | 0.421        | -4.33         | <b>0.009</b> | -0.18       | 0.901            | -0.45         | 0.825        |
| <b>Hannum</b>   |              |                  |              |              |               |              |             |                  |               |              |
| Smoking         | 1.03         | 0.565            | -3.43        | 0.106        | -0.40         | 0.738        | 1.96        | <b>0.005</b>     | -1.83         | 0.152        |
| Sex             | 1.36         | 0.488            | -1.49        | 0.470        | -0.33         | 0.775        | 0.01        | 0.991            | -2.25         | 0.065        |
| BMI             | 0.15         | 0.398            | 0.14         | 0.566        | -0.07         | 0.609        | 0.12        | 0.138            | 0.07          | 0.596        |
| TQI             | -3.26        | 0.357            | 2.32         | 0.338        | 3.02          | <b>0.044</b> | -0.54       | 0.688            | -1.94         | 0.243        |
| <b>EpiTOC</b>   |              |                  |              |              |               |              |             |                  |               |              |
| Smoking         | 0.00         | 0.838            | -0.01        | <b>0.027</b> | -0.00         | 0.599        | 0.01        | <b>0.003</b>     | -0.00         | 0.883        |
| Sex             | 0.01         | 0.288            | -0.02        | <b>0.015</b> | 0.00          | 0.397        | 0.00        | 0.787            | -0.00         | 0.647        |
| BMI             | 0.00         | 0.462            | 0.00         | 0.372        | 0.00          | 0.485        | 0.00        | 0.198            | -0.00         | 0.949        |
| TQI             | -0.01        | 0.714            | -0.01        | 0.303        | 0.00          | 0.851        | -0.01       | <b>0.020</b>     | -0.00         | 0.388        |
| <b>PhenoAge</b> |              |                  |              |              |               |              |             |                  |               |              |
| Smoking         | 1.62         | 0.557            | -3.53        | 0.200        | -1.92         | 0.369        | 4.92        | <b>&lt;0.001</b> | -0.97         | 0.596        |
| Sex             | -0.26        | 0.931            | 1.05         | 0.694        | -2.42         | 0.241        | 2.37        | <b>0.024</b>     | 0.05          | 0.978        |
| BMI             | 0.02         | 0.954            | 0.11         | 0.734        | -0.05         | 0.834        | -0.10       | 0.418            | 0.15          | 0.452        |
| TQI             | -1.26        | 0.815            | 5.64         | 0.074        | 6.02          | <b>0.023</b> | -5.49       | <b>0.009</b>     | -1.45         | 0.544        |
| <b>EpiClock</b> |              |                  |              |              |               |              |             |                  |               |              |
| Smoking         | 3.82         | 0.026            | -1.52        | 0.128        | -0.98         | 0.454        | 2.00        | <b>0.001</b>     | -1.96         | 0.104        |
| Sex             | 2.99         | 0.106            | -1.20        | 0.215        | -0.85         | 0.498        | 0.65        | 0.232            | 0.44          | 0.692        |
| BMI             | 0.30         | 0.080            | 0.08         | 0.501        | -0.01         | 0.967        | 0.07        | 0.284            | 0.14          | 0.285        |
| TQI             | 0.54         | 0.868            | 0.19         | 0.869        | -0.09         | 0.957        | -1.85       | 0.095            | -0.19         | 0.900        |
| <b>AltumAge</b> |              |                  |              |              |               |              |             |                  |               |              |
| Smoking         | 6.96         | <b>0.024</b>     | -0.69        | 0.557        | -3.49         | 0.071        | 3.64        | <b>0.002</b>     | -2.22         | 0.313        |
| Sex             | 4.15         | 0.209            | 1.88         | 0.099        | 0.77          | 0.674        | 1.40        | 0.218            | 0.23          | 0.911        |
| BMI             | 0.70         | <b>0.024</b>     | 0.29         | <b>0.039</b> | -0.14         | 0.515        | 0.16        | 0.240            | 0.26          | 0.280        |
| TQI             | -1.05        | 0.858            | -1.52        | 0.257        | -3.76         | 0.107        | -1.96       | 0.392            | 2.30          | 0.422        |
| <b>Zhang</b>    |              |                  |              |              |               |              |             |                  |               |              |
| Smoking         | -2.32        | 0.214            | -2.18        | <b>0.040</b> | -0.095        | 0.940        | 0.180       | <b>0.004</b>     | -3.82         | 0.086        |
| Sex             | 3.12         | 0.126            | 0.166        | 0.871        | -0.725        | 0.555        | 0.275       | 0.693            | 0.150         | 0.941        |
| BMI             | 0.007        | 0.967            | 0.129        | 0.303        | 0.014         | 0.920        | 0.098       | 0.239            | 0.122         | 0.596        |
| TQI             | -14.3        | <b>&lt;0.001</b> | 1.83         | 0.130        | -1.62         | 0.296        | -2.13       | 0.129            | -0.202        | 0.942        |
| <b>Pace</b>     |              |                  |              |              |               |              |             |                  |               |              |
| Smoking         | 0.009        | 0.898            | 0.064        | <b>0.014</b> | 0.420         | 0.224        | 0.083       | <b>&lt;0.001</b> | 0.006         | 0.805        |
| Sex             | -0.034       | 0.664            | 0.002        | 0.938        | -0.105        | 0.917        | -0.029      | 0.088            | 0.045         | <b>0.039</b> |
| BMI             | -0.003       | 0.651            | -0.001       | 0.632        | 0.001         | 0.722        | -0.002      | 0.226            | 0.001         | 0.596        |
| TQI             | -0.173       | <b>0.222</b>     | -0.064       | <b>0.030</b> | -0.091        | <b>0.032</b> | 0.486       | 0.150            | 0.038         | 0.201        |

The effect of sex is in reference to male and the effect of smoking is reference to non-smokers.

Supplementary Table 13. Linear regression of age acceleration on smoking, BMI, telomere length (sex specific tissues only).

| Observations    | Breast      |              | Ovary       |          | Prostate    |              | Testis      |              |
|-----------------|-------------|--------------|-------------|----------|-------------|--------------|-------------|--------------|
|                 | 36          |              | 142         |          | 111         |              | 45          |              |
|                 | <i>Beta</i> | <i>p</i>     | <i>Beta</i> | <i>p</i> | <i>Beta</i> | <i>p</i>     | <i>Beta</i> | <i>p</i>     |
| <b>Horvath</b>  |             |              |             |          |             |              |             |              |
| Smoking         | -0.39       | 0.841        | 1.29        | 0.078    | -0.81       | 0.438        | 4.62        | <b>0.032</b> |
| BMI             | 0.46        | <b>0.049</b> | -0.06       | 0.511    | 0.16        | 0.225        | -0.29       | 0.217        |
| TQI             | 0.32        | 0.913        | -0.68       | 0.591    | -3.88       | <b>0.023</b> | -3.55       | <b>0.039</b> |
| <b>Hannum</b>   |             |              |             |          |             |              |             |              |
| Smoking         | -2.28       | 0.073        | -0.65       | 0.339    | -1.39       | 0.234        | 1.23        | 0.279        |
| BMI             | 0.41        | <b>0.008</b> | 0.02        | 0.775    | 0.26        | 0.075        | -0.26       | <b>0.045</b> |
| TQI             | -0.31       | 0.868        | 0.97        | 0.405    | -4.58       | <b>0.017</b> | -1.88       | <b>0.042</b> |
| <b>EpiTOC</b>   |             |              |             |          |             |              |             |              |
| Smoking         | -0.01       | 0.241        | -0.00       | 0.301    | 0.00        | 0.979        | 0.00        | 0.204        |
| BMI             | -0.00       | 0.856        | -0.00       | 0.262    | -0.00       | 0.862        | 0.00        | 0.546        |
| TQI             | 0.01        | 0.431        | 0.00        | 0.669    | -0.01       | 0.116        | 0.00        | 0.457        |
| <b>PhenoAge</b> |             |              |             |          |             |              |             |              |
| Smoking         | -4.20       | 0.193        | 0.69        | 0.449    | -0.38       | 0.838        | 1.94        | 0.205        |
| BMI             | 0.56        | 0.139        | -0.00       | 0.996    | 0.40        | 0.091        | 0.12        | 0.477        |
| TQI             | 8.09        | 0.098        | 0.25        | 0.872    | -4.84       | 0.110        | -0.43       | 0.727        |
| <b>EpiClock</b> |             |              |             |          |             |              |             |              |
| Smoking         | 0.02        | 0.991        | 0.02        | 0.973    | 0.12        | 0.933        | 5.12        | <b>0.037</b> |
| BMI             | 0.20        | 0.394        | 0.01        | 0.870    | 0.08        | 0.644        | -0.27       | 0.327        |
| TQI             | 3.82        | 0.213        | 1.48        | 0.145    | -5.38       | <b>0.017</b> | -5.54       | <b>0.006</b> |
| <b>AltumAge</b> |             |              |             |          |             |              |             |              |
| Smoking         | -5.55       | 0.125        | 2.02        | 0.185    | -1.27       | 0.354        | 6.82        | 0.103        |
| BMI             | 0.44        | 0.296        | -0.02       | 0.909    | 0.08        | 0.660        | -0.50       | 0.286        |
| TQI             | 0.76        | 0.886        | 1.04        | 0.692    | -6.53       | <b>0.004</b> | -6.38       | 0.059        |
| <b>Zhang</b>    |             |              |             |          |             |              |             |              |
| Smoking         | -1.32       | 0.339        | 0.009       | 0.995    | -0.378      | 0.677        | 6.45        | <b>0.034</b> |
| BMI             | 0.297       | 0.072        | -0.194      | 0.154    | 0.196       | 0.088        | -0.085      | 0.799        |
| TQI             | 1.31        | 0.542        | 0.906       | 0.651    | -4.38       | 0.004        | -4.34       | 0.073        |
| <b>Pace</b>     |             |              |             |          |             |              |             |              |
| Smoking         | 0.118       | <b>0.003</b> | 0.007       | 0.547    | 0.334       | 0.222        | -0.008      | 0.588        |
| BMI             | 0.008       | 0.082        | 0.001       | 0.518    | -0.006      | 0.108        | 0.004       | <b>0.032</b> |
| TQI             | 0.082       | 0.146        | -0.009      | 0.669    | -0.075      | 0.093        | 0.005       | 0.700        |

The effect of smoking is in reference to non-smoking.
