# Supplementary material for: Characterization of DNA methylation clock algorithms applied to diverse tissue types
Source: Aging (Albany NY). 2025 Jan 3;17(1):67–96. doi: 10.18632/aging.206182 (PMC11810061; doi:10.18632/aging.206182)
Supplement: Supplementary Table 11 [file aging-17-206182-s003.xlsx]

## Sheet: Luekocytes_pct_models
Supplementary Table 11. Linear regression results of aging clocks with leukocytes%, age and the interaction effects
Tissue	Variables	Horvath		Hannum		PhenoAge		EpiClock		AltumAge		EpiTOC		ZhangClock		PACE
		beta (SE)	p	beta (SE)	p	beta (SE)	p	beta (SE)	p	beta (SE)	p	beta (SE)	p	beta (SE)	p	beta (SE)	p
Breast	Leukocyte%	89.34 (81.83)	0.28	-5.5 (73.94)	0.94	-2.65 (126.43)	0.98	16.07 (75.52)	0.83	-136.21 (170.64)	0.43	0.261 (0.178)	0.15	96.94 (77.93)	0.22	-0.04 (1.39)	0.97
	Age (yrs)	0.73 (0.27)	0.01	0.31 (0.25)	0.22	0.46 (0.42)	0.29	0.59 (0.25)	0.02	0.84 (0.57)	0.15	0.001 (0.001)	0.13	0.88 (0.26)	0.002	-0.001 (0.005)	0.91
	Leukocyte% x Age Interaction	-1.22 (1.42)	0.39	0.12 (1.29)	0.92	-0.02 (2.2)	0.99	0.35 (1.31)	0.79	2.33 (2.97)	0.44	-0.005 (0.003)	0.14	-1.5 (1.34)	0.27	0.02 (0.02)	0.53
Colon	Leukocyte%	3.88 (12.83)	0.76	64.75 (36.12)	0.07	90.49 (47.16)	0.06	37.81 (15.93)	0.02	65.35 (23.42)	0.01	0.151 (0.103)	0.15	23 (21.36)	0.28	-0.05 (0.48)	0.91
	Age (yrs)	0.72 (0.07)	<.0001	0.56 (0.2)	0.01	0.71 (0.26)	0.01	0.7 (0.09)	<.0001	1.62 (0.13)	<.0001	0.001 (0.001)	0.21	0.68 (0.12)	<.0001	0.002 (0.003)	0.37
	Leukocyte% x Age Interaction	0.08 (0.22)	0.73	-0.41 (0.63)	0.52	-0.59 (0.82)	0.47	-0.11 (0.28)	0.7	-0.99 (0.41)	0.02	0.001 (0.002)	0.59	-0.18 (0.37)	0.63	-0.0002 (0.01)	0.98
Kidney	Leukocyte%	86.82 (57.3)	0.14	-26.89 (56.24)	0.63	-123.76 (96)	0.2	-10.34 (54.41)	0.85	90.06 (86.95)	0.31	0.085 (0.109)	0.44	76.56 (48.13)	0.12	1.37 (1.16)	0.25
	Age (yrs)	0.93 (0.13)	<.0001	0.48 (0.13)	0.0006	0.25 (0.22)	0.27	0.67 (0.13)	<.0001	1.21 (0.2)	<.0001	0.0002 (0.0003)	0.55	0.88 (0.11)	<.0001	0.004 (0.003)	0.14
	Leukocyte% x Age Interaction	-1.22 (0.88)	0.17	0.43 (0.86)	0.63	2.2 (1.47)	0.14	0.45 (0.84)	0.59	-1.59 (1.34)	0.24	0.001 (0.002)	0.59	-0.89 (0.74)	0.23	-0.01 (0.02)	0.52
Lung	Leukocyte%	-46.69 (18.41)	0.01	-52.72 (17.13)	0.002	5.96 (24.37)	0.81	-22.21 (13.83)	0.11	26.69 (29.95)	0.37	-0.115 (0.048)	0.02	-59.2 (24.03)	0.01	-0.45 (0.42)	0.29
	Age (yrs)	0.24 (0.16)	0.13	0.16 (0.15)	0.28	0.29 (0.21)	0.16	0.48 (0.12)	<.0001	1.79 (0.26)	<.0001	-0.001 (0.0004)	0.06	0.33 (0.21)	0.11	0.003 (0.004)	0.48
	Leukocyte% x Age Interaction	1.03 (0.33)	0.002	0.96 (0.31)	0.002	0.9 (0.44)	0.04	0.69 (0.25)	0.01	-0.25 (0.54)	0.64	0.003 (0.001)	0.003	1.05 (0.43)	0.02	-0.002 (0.008)	0.75
Muscle	Leukocyte%	40.29 (93.96)	0.67	-27.31 (57.86)	0.64	149.41 (91.91)	0.11	4.45 (70.38)	0.95	-114.91 (126.66)	0.37	-0.019 (0.058)	0.74	-21.95 (136.22)	0.87	-0.92 (1.38)	0.51
	Age (yrs)	0.3 (0.23)	0.19	0.09 (0.14)	0.51	0.49 (0.22)	0.03	0.31 (0.17)	0.08	0.59 (0.31)	0.06	0.000003 (0.0001)	0.99	0.21 (0.33)	0.53	-0.003 (0.003)	0.38
	Leukocytes% and Age Interaction	0.87 (1.56)	0.58	1.66 (0.96)	0.09	-1.32 (1.53)	0.39	0.57 (1.17)	0.63	2.1 (2.11)	0.32	0.001 (0.001)	0.48	1.16 (2.27)	0.61	0.02 (0.02)	0.45
Ovary	Leukocyte%	19.7 (42.47)	0.64	39.06 (31.95)	0.22	40.7 (42.43)	0.34	0.71 (36.08)	0.98	-112.69 (68.19)	0.1	-0.014 (0.024)	0.55	6.16 (49.32)	0.9	2 (0.61)	0.001
	Age (yrs)	0.3 (0.09)	0.001	0.25 (0.07)	0.0003	0.14 (0.09)	0.11	0.26 (0.08)	0.0009	0.46 (0.15)	0.002	-0.00002 (0.0001)	0.65	0.24 (0.1)	0.02	0.004 (0.001)	0.002
	Leukocyte% x Age Interaction	0.75 (0.96)	0.44	-0.2 (0.72)	0.78	0.51 (0.96)	0.59	0.33 (0.81)	0.68	2.85 (1.54)	0.07	0.001 (0.001)	0.03	0.47 (1.1)	0.67	-0.03 (0.01)	0.07
Prostate	Leukocyte%	-10.22 (20.92)	0.63	-36.03 (28.14)	0.2	26.37 (39.99)	0.51	11.96 (28.27)	0.67	-69.1 (30.5)	0.03	0.05 (0.073)	0.49	21.37 (31.19)	0.49	1.83 (0.5)	0.0004
	Age (yrs)	0.59 (0.05)	<.0001	0.3 (0.06)	<.0001	0.61 (0.09)	<.0001	0.68 (0.06)	<.0001	1.1 (0.07)	<.0001	0.0004 (0.0002)	0.02	0.58 (0.07)	<.0001	0.005 (0.001)	<.0001
	Leukocyte% x Age Interaction	0.51 (0.35)	0.16	0.76 (0.48)	0.11	0.19 (0.68)	0.78	0.32 (0.48)	0.5	1.21 (0.52)	0.02	0.0003 (0.0012)	0.78	-0.32 (0.53)	0.55	-0.02 (0.01)	0.01
Testis	Leukocyte%	-27.08 (53.34)	0.61	-32.81 (36.91)	0.38	-4.23 (58.54)	0.94	116.46 (69.41)	0.1	47.16 (140.39)	0.74	-0.002 (0.057)	0.97	102.79 (130.57)	0.44	-0.65 (0.6)	0.28
	Age (yrs)	0.2 (0.08)	0.02	0.1 (0.06)	0.08	0.34 (0.09)	0.0005	0.27 (0.11)	0.02	0.51 (0.22)	0.03	0.0001 (0.0001)	0.56	0.33 (0.21)	0.11	0.00003 (0.0009)	0.98
	Leukocyte% x Age Interaction	1.21 (0.88)	0.18	1.4 (0.61)	0.03	0.52 (0.97)	0.6	0.01 (1.15)	0.99	1.82 (2.32)	0.44	0.001 (0.001)	0.34	0.13 (2.16)	0.95	0.01 (0.01)	0.41
Whole Blood	Leukocyte%	-404.32 (663.74)	0.55	216.69 (617.28)	0.73	-1101.57 (874.82)	0.21	-156.76 (796.64)	0.84	349.61 (1112.41)	0.75	2.836 (2.417)	0.25	-65.59 (664.07)	0.92	-11.44 (24.53)	0.64
	Age (yrs)	-4.08 (10.63)	0.7	5.89 (9.89)	0.55	-10.91 (14.02)	0.44	0.24 (12.21)	0.98	5.42 (17.82)	0.76	0.046 (0.039)	0.24	1.13 (10.64)	0.92	-0.1 (0.39)	0.8
	Leukocyte% x Age Interaction	5.13 (10.92)	0.64	-5.11 (10.16)	0.62	12.23 (14.4)	0.4	0.83 (12.54)	0.95	-3.79 (18.3)	0.84	-0.046 (0.04)	0.25	-0.06 (10.93)	1	0.1 (0.4)	0.8
*In each linear regression model, DNAm clock is the outcome and the predictors are the leukocytes%, age, and the interaction term of leukocytes% and age in each tissue.
